# Supplementary material for: Multistage construction of Gd-doped g-C3N4/Mo15S19 composites enabled both N2 activation and multiple electron transfer for an enhanced photocatalytic nitrogen reduction reaction
Source: Royal Society of Chemistry journal article supplement (doi:10.1039/d4qi02016b), 2024-01-01
Supplement: d4qi02016b1.pdf [file d4qi02016b1.pdf]

**Multistage construction of Gd-Doped g-C<sub>3</sub>N<sub>4</sub>/Mo<sub>15</sub>S<sub>19</sub> Composites**  
**Enabled Both N<sub>2</sub> activation and multiple electron transfer for**  
**Enhanced Photocatalytic Nitrogen Reduction Reaction**

Xiaoyu Jiang,<sup>a,b</sup> Boran Tao,<sup>c</sup> Hongda Li<sup>a,b,\*</sup>

<sup>a</sup> School of Chemistry and Chemical Engineering, Hubei Normal University, Huangshi 435002, China

<sup>b</sup> Suzhou Institute for Advanced Research, University of Science and Technology of China, Suzhou 215123, China

<sup>c</sup> Tianmu Lake Institute of Advanced Energy Storage Technologies Co., Ltd., Liyang 213300, China

Corresponding author: Hongda Li, [hdli@ustc.edu.cn](mailto:hdli@ustc.edu.cn)

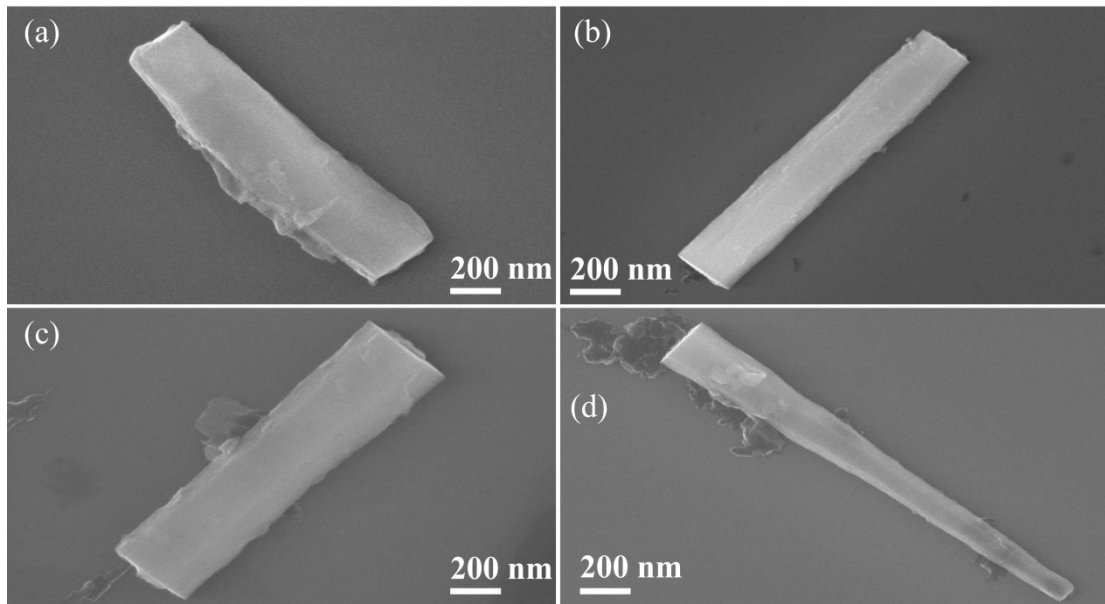

**Fig. S1.** SEM images of (a)  $C_3N_4$ , (b)  $GdC_3N_4$ , (c)  $GdC_3N_4/Mo_{15}S_{19}$ , and (d)  $C_3N_4/Mo_{15}S_{19}$

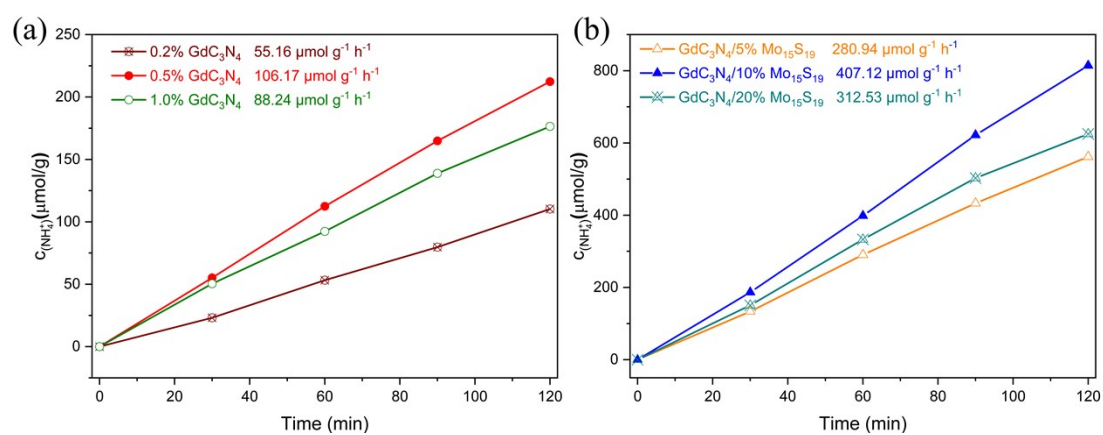

**Fig. S2.** (a) Photocatalytic NRR of 0.2% GdC<sub>3</sub>N<sub>4</sub>, 0.5% GdC<sub>3</sub>N<sub>4</sub>, 1.0% GdC<sub>3</sub>N<sub>4</sub> under visible light irradiation; (b) Photocatalytic NRR of GdC<sub>3</sub>N<sub>4</sub>/5% Mo<sub>15</sub>S<sub>19</sub>, GdC<sub>3</sub>N<sub>4</sub>/10% Mo<sub>15</sub>S<sub>19</sub>, GdC<sub>3</sub>N<sub>4</sub>/20% Mo<sub>15</sub>S<sub>19</sub> under visible light irradiation

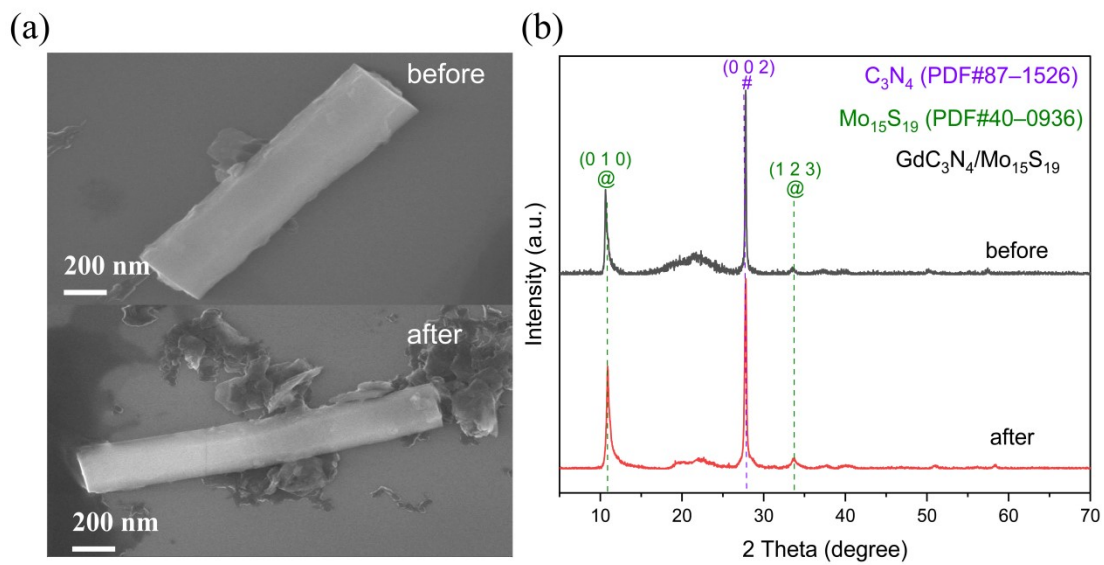

**Fig. S3.** (a) SEM images and (b) XRD patterns of  $\text{GdC}_3\text{N}_4/\text{Mo}_{15}\text{S}_{19}$  samples before and after the reaction (four cycles).

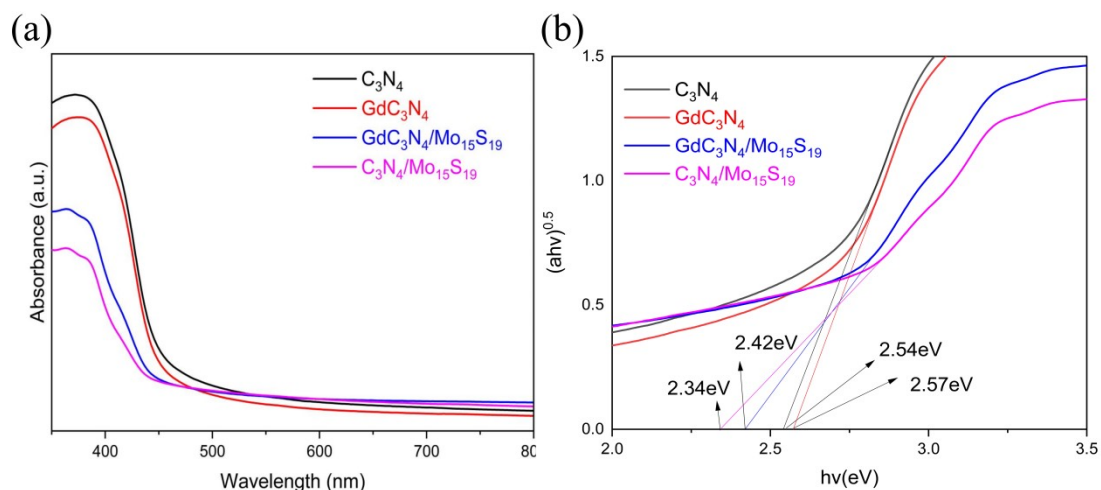

**Fig. S4.** (a) UV-vis diffuse reflectance spectra (DRS) of g- $C_3N_4$ ,  $GdC_3N_4$ ,  $GdC_3N_4/Mo_{15}S_{19}$ , and  $C_3N_4/Mo_{15}S_{19}$ . (b) Band gap values of g- $C_3N_4$ ,  $GdC_3N_4$ ,  $GdC_3N_4/Mo_{15}S_{19}$ , and  $C_3N_4/Mo_{15}S_{19}$ . The bandgap calculation formula is given by:  $(\alpha h\nu)^{1/2} = A(h\nu - E_g)$ , in which  $A$ ,  $h$ ,  $\nu$ ,  $\alpha$ , and  $E_g$  represent the proportionality constant, Planck's constant, absorption coefficient, light frequency, and bandgap energy, respectively.

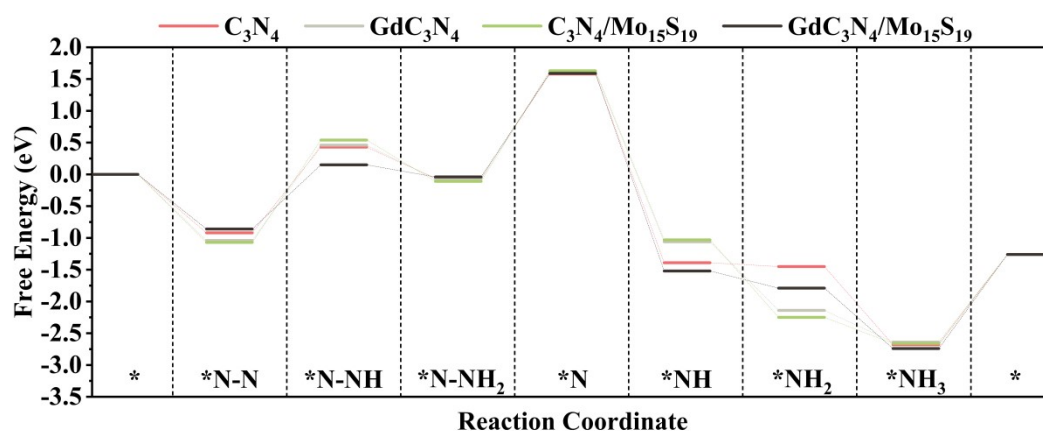

Fig. S5. Gibbs free energy profiles of the distal mechanism for the NRR process on the g-C<sub>3</sub>N<sub>4</sub>, GdC<sub>3</sub>N<sub>4</sub>, GdC<sub>3</sub>N<sub>4</sub>/Mo<sub>15</sub>S<sub>19</sub>, and C<sub>3</sub>N<sub>4</sub>/Mo<sub>15</sub>S<sub>19</sub> catalysts.

**Table S1.** Element concentrations by Energy dispersive spectrometer (EDS), BET specific surface areas of g-C<sub>3</sub>N<sub>4</sub>, GdC<sub>3</sub>N<sub>4</sub>, GdC<sub>3</sub>N<sub>4</sub>/Mo<sub>15</sub>S<sub>19</sub> and C<sub>3</sub>N<sub>4</sub>/Mo<sub>15</sub>S<sub>19</sub>.

| <b>Samples</b>                                       | <b>g-C<sub>3</sub>N<sub>4</sub></b> | <b>GdC<sub>3</sub>N<sub>4</sub></b> | <b>GdC<sub>3</sub>N<sub>4</sub>/Mo<sub>15</sub>S<sub>19</sub></b> | <b>C<sub>3</sub>N<sub>4</sub>/Mo<sub>15</sub>S<sub>19</sub></b> |
|------------------------------------------------------|-------------------------------------|-------------------------------------|-------------------------------------------------------------------|-----------------------------------------------------------------|
| <b>Surface areas (m<sup>2</sup> g<sup>-1</sup>)</b>  | 16.16                               | 17.25                               | 42.13                                                             | 42.30                                                           |
| <b>C Mass%</b>                                       | 72.11                               | 71.66                               | 64.58                                                             | 65.03                                                           |
| <b>N Mass%</b>                                       | 27.89                               | 27.86                               | 25.13                                                             | 25.44                                                           |
| <b>Gd Mass%</b>                                      | /                                   | 0.48                                | 0.42                                                              | /                                                               |
| <b>Mo Mass%</b>                                      | /                                   | /                                   | 6.92                                                              | 6.72                                                            |
| <b>S Mass%</b>                                       | /                                   | /                                   | 2.95                                                              | 2.81                                                            |
| <b>Real Gd (wt.%, Gd/C<sub>3</sub>N<sub>4</sub>)</b> | /                                   | 0.48                                | 0.47                                                              | /                                                               |
| <b>Real Mo/S (at.%)</b>                              | /                                   | /                                   | 15.00:19.18                                                       | 15.00:18.81                                                     |
| <b>Real Mo<sub>15</sub>S<sub>19</sub> (wt.%)</b>     | /                                   | /                                   | 9.87                                                              | 9.53                                                            |

**Table S2.** The adsorption energies of N<sub>2</sub> on Mo, S, N, C, and Gd sites

| <b>Site</b> | <b>Adsorption Energy (eV)</b> |
|-------------|-------------------------------|
| Mo          | -0.92                         |
| Gd          | -0.87                         |
| N           | -0.75                         |
| C           | -0.69                         |
| S           | -0.63                         |



**Table S3.** Photocatalytic nitrogen fixation performance of different catalysts under various reaction conditions.

| Catalysts                                                         | Scavenger | Light Source            | NH <sub>3</sub> generation rate<br>μmol g <sup>-1</sup> h <sup>-1</sup> | Ref.      |
|-------------------------------------------------------------------|-----------|-------------------------|-------------------------------------------------------------------------|-----------|
| S-doped Bi <sub>2</sub> MoO <sub>6</sub>                          | None      | 300 W Xe lamp, λ>420 nm | 122.14                                                                  | S1        |
| 5% Cu/InVO <sub>4</sub>                                           | None      | 300 W Xe lamp           | 195.11                                                                  | S2        |
| BiVO <sub>4</sub> /VS-MoS <sub>2</sub>                            | None      | 300 W Xe lamp           | 132.8                                                                   | S3        |
| IL-TiO <sub>2-x</sub>                                             | Methanol  | 300 W Xe lamp           | 22.7                                                                    | S4        |
| MoS <sub>2</sub> /In-Bi <sub>2</sub> MoO <sub>6</sub>             | None      | 300 W Xe lamp           | 90                                                                      | S5        |
| BiOBr/g-C <sub>3</sub> N <sub>4</sub>                             | None      | 300 W Xe lamp           | 164.69                                                                  | S6        |
| Ru <sub>1</sub> /TiO <sub>2</sub> -Vo                             | None      | 300 W Xe lamp           | 18.9                                                                    | S7        |
| Gd-Bi <sub>2</sub> MoO <sub>6</sub>                               | None      | 300 W Xe lamp, λ>420 nm | 300.15                                                                  | S8        |
| CdS/WO <sub>3</sub>                                               | None      | 300 W Xe lamp           | 35.8                                                                    | S9        |
| Ni <sub>2</sub> P-BP                                              | Methanol  | 300 W Xe lamp, λ>420 nm | 6.14                                                                    | S10       |
| GdC <sub>3</sub> N <sub>4</sub> /Mo <sub>15</sub> S <sub>19</sub> | None      | 300 W Xe lamp, λ>420 nm | 407.51                                                                  | This work |

## References

- S1 Z. Liu, M. Luo, Y. Cao, L. Meng, Y. Yang and X. Li, Tuning the electronic properties of  $\text{Bi}_2\text{MoO}_6$  by S-doping to boost efficient photocatalytic nitrogen fixation reactions. *J. Catal.* 2024, **430**, 115347.
- S2 S. Yao, J. Lin, K. Yi, W. Liu, and M. Wang, Cu-modified  $\text{InVO}_4$  photocatalysts for enhanced  $\text{N}_2$  fixation using chemical reagents and electroplating sludge as the Cu source. *Chem. Commun.* 2024, **60**, 1790.
- S3 H. Luo, Z. Liu, M. Zhang, Y. Mu and M. Zhang, Construction of a  $\text{BiVO}_4/\text{VS-MoS}_2$  S-scheme heterojunction for efficient photocatalytic nitrogen fixation. *Nanoscale Adv.*, 2024, **6**, 1781.
- S4 X. Gong, B. Chong, M. Xia, H. Li, H. Ou, and G. Yang, Fluorinated phosphonium ionic liquid boosts the  $\text{N}_2$ -adsorbing ability of  $\text{TiO}_2$  for efficient photocatalytic  $\text{NH}_3$  synthesis. *Catal. Sci. Technol.* 2024, **14**, 343.
- S5 T. Ma, R. Li, Y. C. Huang, Y. Lu, L. Guo, M. Niu, X. Huang, R. A. Soomro, J. Ren, Q. Wang, B. Xu, C. Yang, F. Fu and D. Wang, Interfacial Chemical-Bonded  $\text{MoS}_2/\text{In-Bi}_2\text{MoO}_6$  Heterostructure for Enhanced Photocatalytic Nitrogen-to-Ammonia Conversion. *ACS Catal.* 2024, **14**(8), 6292-6304.
- S6 L. Zhang, M. Jiang, H. Tian, S. Liu, X. Zhou, H. Liu, S. Gan, S. Che, Z. Chen, Y. Li, T. Wang, G. Wang and C. Wang, Oxygen and Nitrogen Vacancies in a  $\text{BiOBr}/\text{g-C}_3\text{N}_4$  Heterojunction for Sustainable Solar Ammonia Fertilizer Synthesis. *ACS Sus. Chem. Eng.* 2024, **12**(5), 2028-2040.
- S7 G. Ren, M. Shi, S. Liu, Z. Li, Z. Zhang and X. Meng, Molecular-level insight into photocatalytic reduction of  $\text{N}_2$  over Ruthenium single atom modified  $\text{TiO}_2$  by electronic Metal-support interaction. *Chem. Eng. J.* 2023, **454**, 140158.
- S8 H. Li, H. Zhao, C. Li, B. Li, B. Tao, S. Gu, G. Wang and H. Chang, Redox regulation of photocatalytic nitrogen reduction reaction by gadolinium doping in two-dimensional bismuth molybdate nanosheets. *Appl. Surf. Sci.* 2022, **600**, 154105.
- S9 P. Xia, X. Pan, S. Jiang, J. Yu, B. He, P. M. Ismail, W. Bai, J. Yang, L. Yang, H. Zhang, M. Cheng, H. Li, Q. Zhang, C. Xiao and Y. Xie, Designing a Redox Heterojunction for Photocatalytic “Overall Nitrogen Fixation” under Mild Conditions. *Adv. Mater.* 2022, **34**, 2200563.
- S10 Z.-K. Shen, Y. Jin, X. Zhang, J. Wu, H. Wang, and Z. Huang, Identifying the role of interface

chemical bonds in activating charge transfer for enhanced photocatalytic nitrogen fixation of Ni<sub>2</sub>P-black phosphorus photocatalysts. *Appl. Catal. B: Environ.* 2021, **295**, 120274.
